# Supplementary material for: A common mechanism involving the TORC1 pathway can lead to amphotericin B-persistence in biofilm and planktonic Saccharomyces cerevisiae populations
Source: PubMed Central journal article supplement (PMC4763212; doi:10.1038/srep21874), 2016-02-23
Supplement: srep21874-s1.pdf [file srep21874-s1.pdf]

## **SUPPLEMENTARY INFORMATION**

**A common mechanism involving the TORC1 pathway can lead to amphotericin B-persistence  
in biofilm and planktonic *Saccharomyces cerevisiae* populations**

**Rasmus Bojsen, Birgitte Regenber, David Gresham, and Anders Folkesson**

**Supplementary Figure S1.** Pooled haploid gene deletion mutants were cultivated as biofilm or planktonic cells in four biological replicates (colored circles). After four days, half of the populations were treated with 10  $\mu\text{g/ml}$  amphotericin B (AmB) for 12 hours (+ AmB) or untreated (- AmB) as controls. Surviving cells were enriched by outgrowth in YPD before barcode sequencing.

## EXPERIMENTAL SETUP

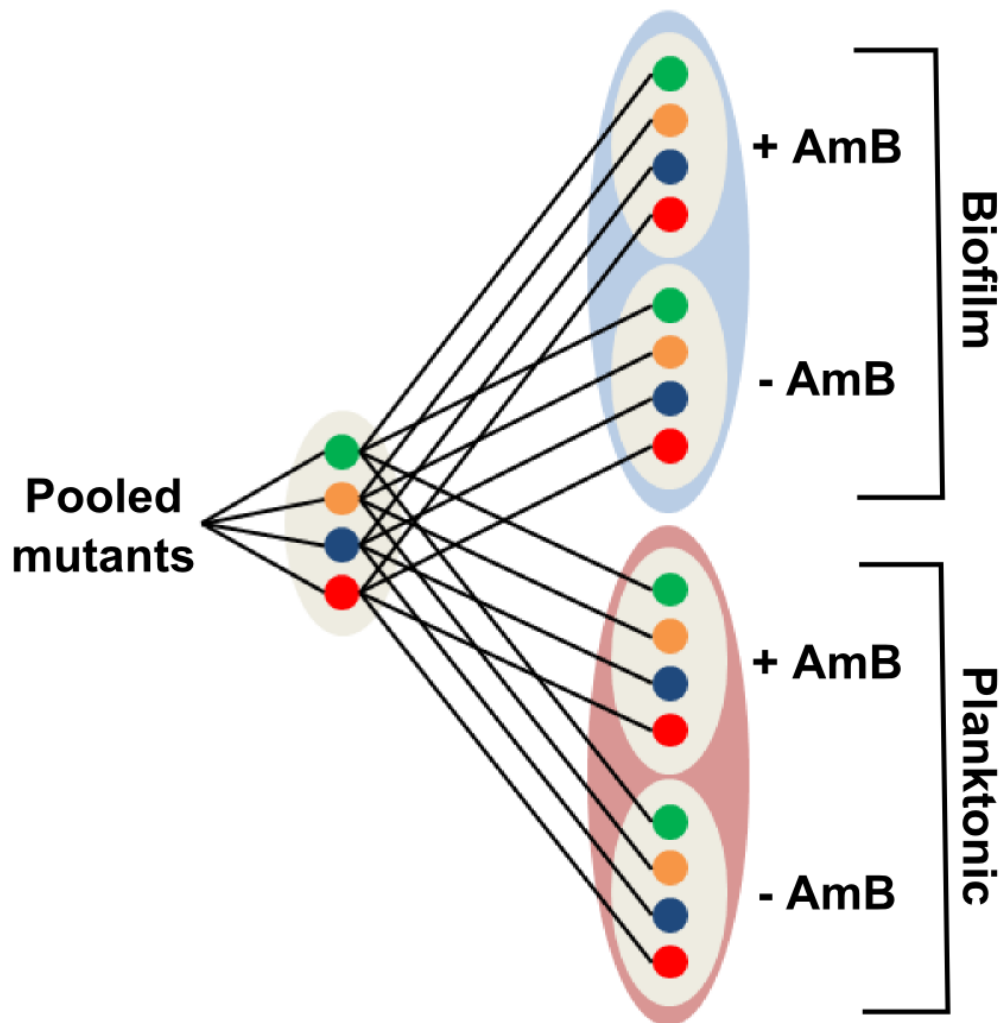

**Supplementary Figure S2.** Multidimensional scaling plot show reproducibility of the four biological replicates. Untreated biofilm cells (blue circles), untreated planktonic cells (red circles), amphotericin B (AmB)-treated biofilm cells (blue triangles), and AmB-treated planktonic cells (red triangles, two of them are on top of each other in the lower right corner). Distances correspond to leading log-fold-changes between each pair of samples.

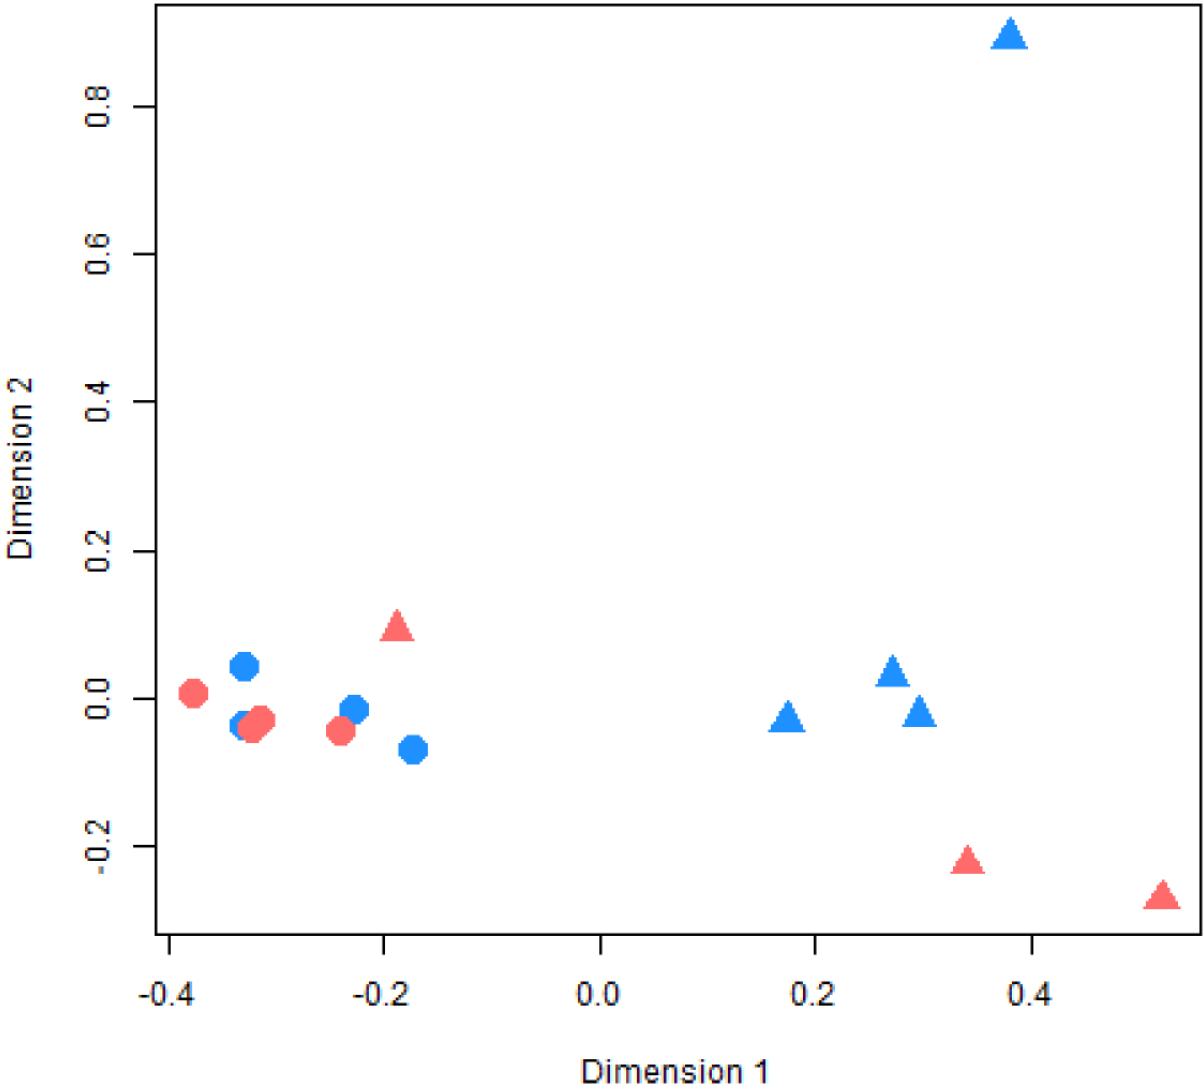

**Supplementary Figure S3.** Log<sub>10</sub> fold change (logFC) in sequencing reads between treated and untreated samples and total abundance of mutants in mixed populations. Measurements are log<sub>10</sub> counts per million (logCPM). (a) Smear plot of correlation between mutant abundance after amphotericin B (AmB) treatment and total number of sequencing counts for biofilm-grown cells. (b) As (a) for planktonically grown cells.

**a**

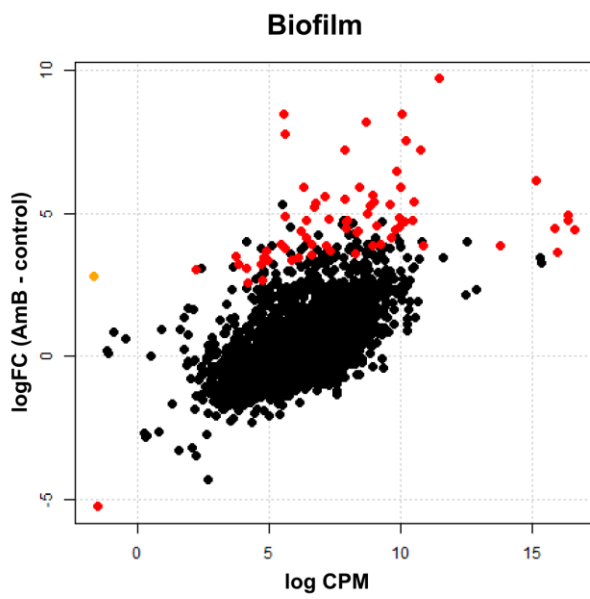

**b**

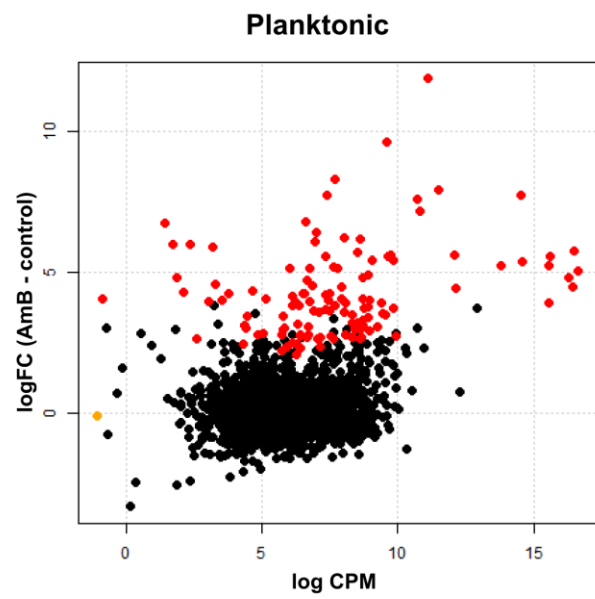

**Supplementary Figure S4.** Log number of sequencing reads of uptag (UP) andowntag (DOWN) barcodes.

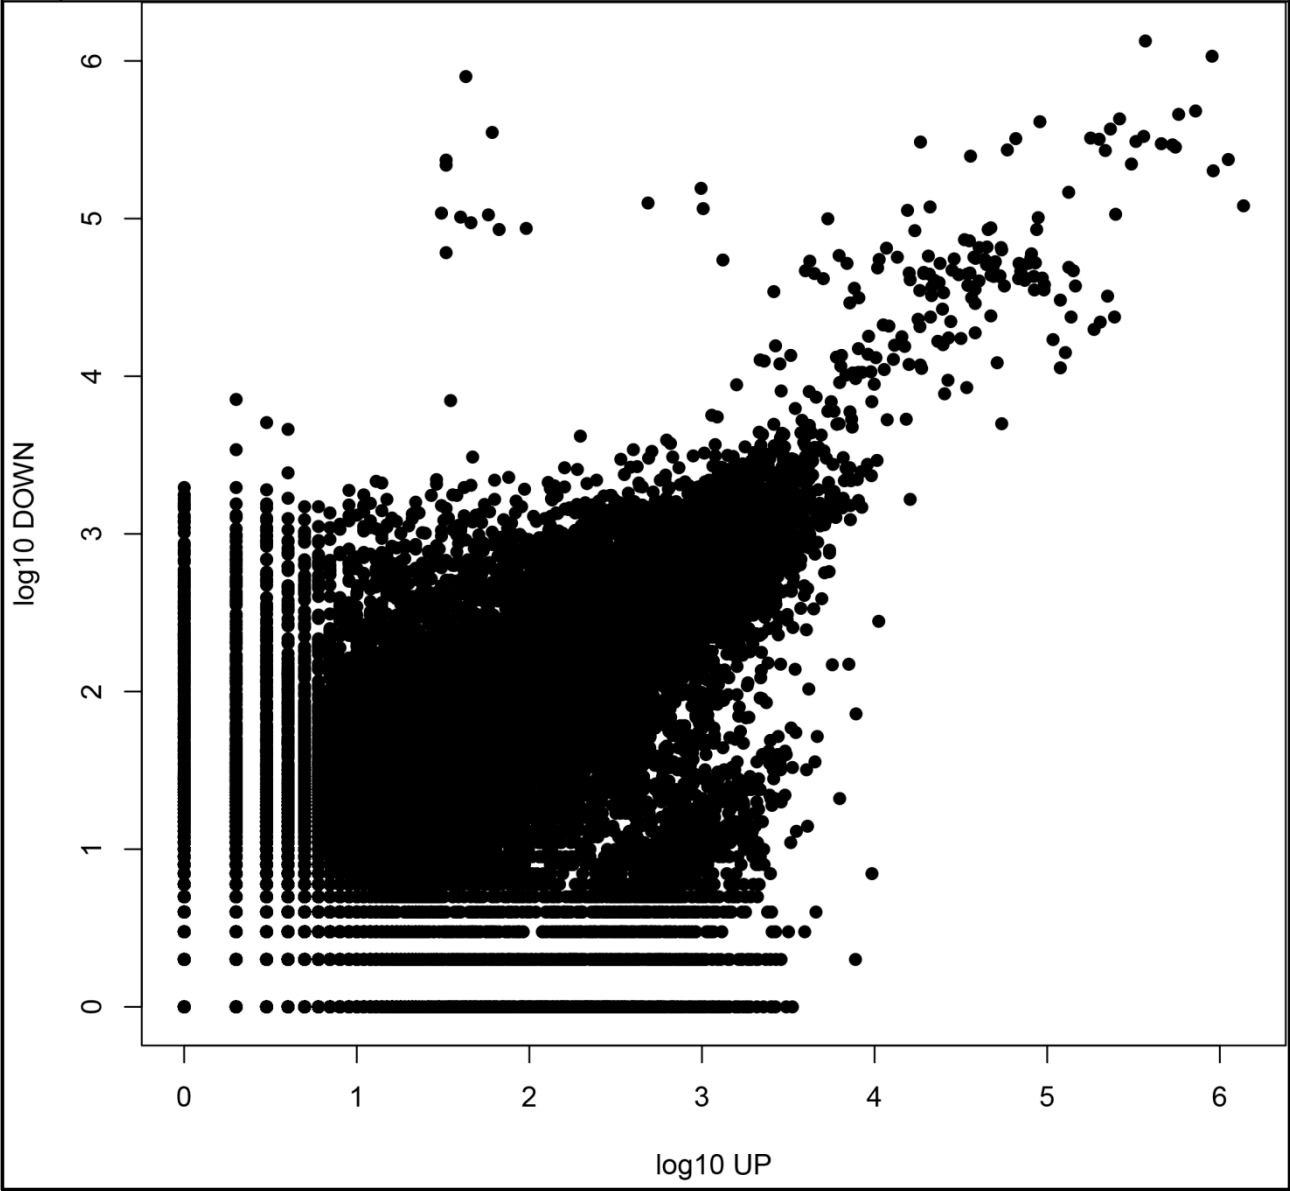

**Supplementary Figure S5.** Comparison of mean barcode count with associated variance. Red X, average variance per bin; blue point, estimated variance of each mutant after dispersion shrinkage.

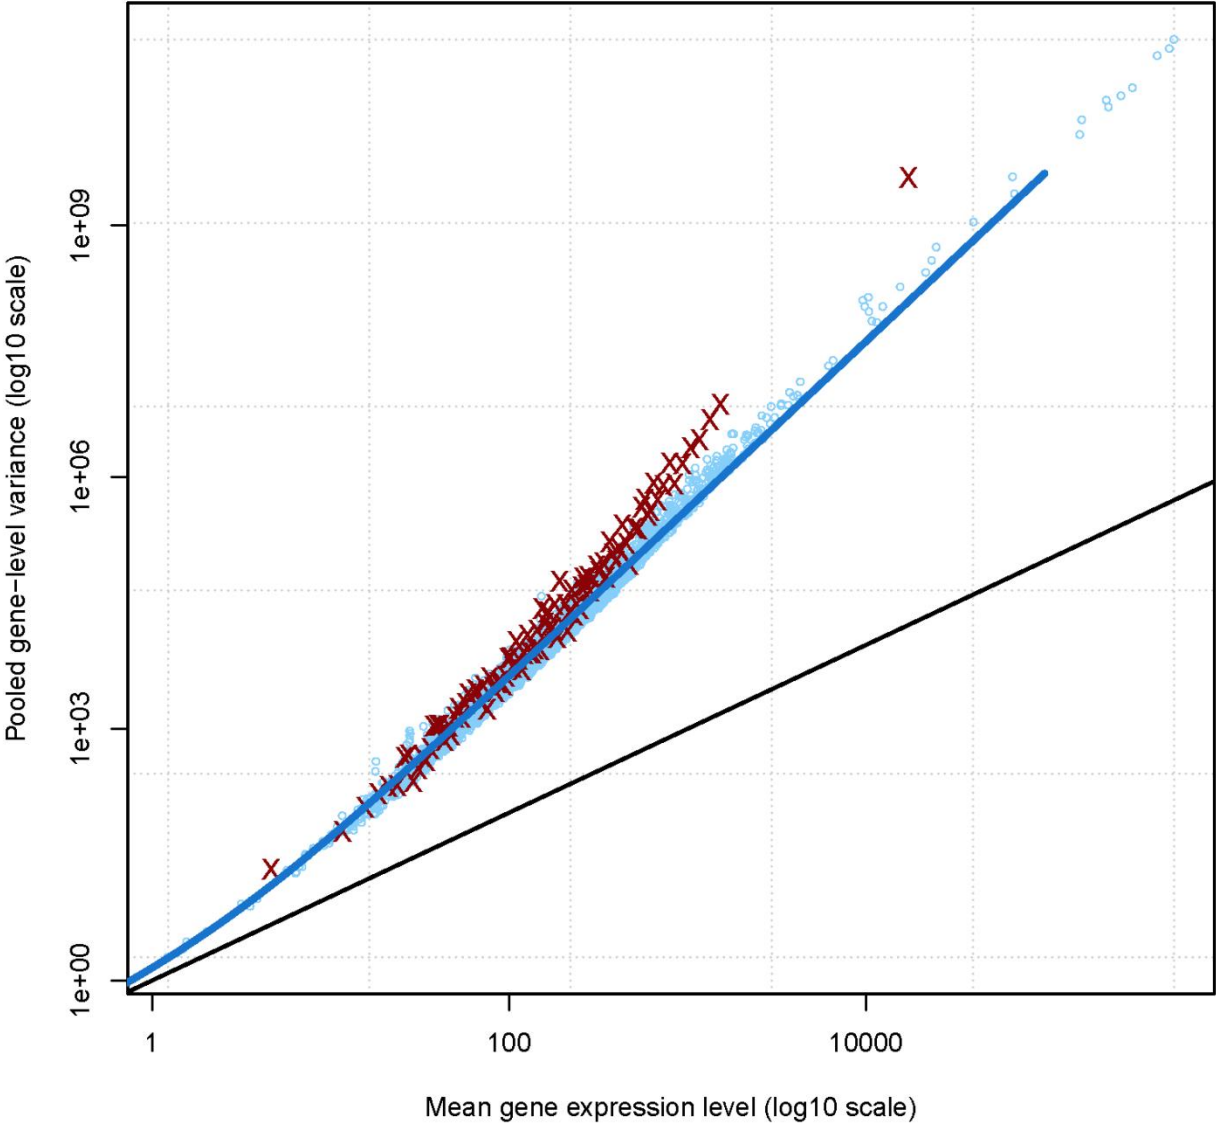

**Supplementary Table S1.** Fold-change in mutant abundance before and after amphotericin B treatment

**Supplementary Table S2.** Significantly enriched mutants after amphotericin B treatment grouped by annotated function

**Supplementary Table S3.** Amino acid concentrations used in minimal medium.

| <b>Supplement</b> | <b>Medium concentration (mg/l)</b> |
|-------------------|------------------------------------|
| L-Adenine         | 35                                 |
| L-Alanine         | 120                                |
| L-Arginine        | 120                                |
| L-Asparagine      | 120                                |
| L-Aspartic acid   | 120                                |
| L-Cysteine        | 180                                |
| L-Glutamic acid   | 180                                |
| L-Glutamine       | 120                                |
| Glycine           | 120                                |
| L-Histidine       | 120                                |
| L-Isoleucine      | 180                                |
| L-Leucine         | 180                                |
| L-Lysine          | 180                                |
| L-Methionine      | 75                                 |
| L-Phenylalanine   | 75                                 |
| L-Proline         | 120                                |
| L-Serine          | 120                                |
| L-Threonine       | 150                                |
| L-Tryptophan      | 120                                |
| L-Tyrosine        | 45                                 |
| L-Valine          | 180                                |
| Uracil            | 120                                |



**Supplementary Table S4.** Primers used for barcode sequencing<sup>1</sup>.

| <b>Primer name</b>      | <b>Primer sequence</b>                                                           |
|-------------------------|----------------------------------------------------------------------------------|
| Illumina UPTAG Index 1  | ACG CTC TTC CGA TCT ATACC GTC CAC GAG GTC TCT                                    |
| Illumina DNTAG Index 1  | ACG CTC TTC CGA TCT ATACC GTG TCG GTC TCG TAG                                    |
| Illumina UPTAG Index 19 | ACG CTC TTC CGA TCT GGAAC GTC CAC GAG GTC TCT                                    |
| Illumina DNTAG Index 19 | ACG CTC TTC CGA TCT GGAAC GTG TCG GTC TCG TAG                                    |
| Illumina UPTAG Index 20 | ACG CTC TTC CGA TCT CTCAG GTC CAC GAG GTC TCT                                    |
| Illumina DNTAG Index 20 | ACG CTC TTC CGA TCT CTCAG GTG TCG GTC TCG TAG                                    |
| Illumina UPTAG Index 21 | ACG CTC TTC CGA TCT ACTGG GTC CAC GAG GTC TCT                                    |
| Illumina DNTAG Index 21 | ACG CTC TTC CGA TCT ACTGG GTG TCG GTC TCG TAG                                    |
| Illumina UPTAG Index 22 | ACG CTC TTC CGA TCT TACAT GTC CAC GAG GTC TCT                                    |
| Illumina DNTAG Index 22 | ACG CTC TTC CGA TCT TACAT GTG TCG GTC TCG TAG                                    |
| Illumina UPTAG Index 23 | ACG CTC TTC CGA TCT GGCAT GTC CAC GAG GTC TCT                                    |
| Illumina DNTAG Index 23 | ACG CTC TTC CGA TCT GGCAT GTG TCG GTC TCG TAG                                    |
| Illumina UPTAG Index 24 | ACG CTC TTC CGA TCT CAGTT GTC CAC GAG GTC TCT                                    |
| Illumina DNTAG Index 24 | ACG CTC TTC CGA TCT CAGTT GTG TCG GTC TCG TAG                                    |
| Illumina UPTAG Index 25 | ACG CTC TTC CGA TCT ATACC GTC CAC GAG GTC TCT                                    |
| Illumina DNTAG Index 25 | ACG CTC TTC CGA TCT ACCAG GTG TCG GTC TCG TAG                                    |
| Illumina UPTAG Index 26 | ACG CTC TTC CGA TCT TTAGC GTC CAC GAG GTC TCT                                    |
| Illumina DNTAG Index 26 | ACG CTC TTC CGA TCT TTAGC GTG TCG GTC TCG TAG                                    |
| Illumina UPTAG Index 27 | ACG CTC TTC CGA TCT GCCAC GTC CAC GAG GTC TCT                                    |
| Illumina DNTAG Index 27 | ACG CTC TTC CGA TCT GCCAC GTG TCG GTC TCG TAG                                    |
| Illumina UPTAG Index 28 | ACG CTC TTC CGA TCT CGACC GTC CAC GAG GTC TCT                                    |
| Illumina DNTAG Index 28 | ACG CTC TTC CGA TCT CGACC GTG TCG GTC TCG TAG                                    |
| Illumina UPTAG Index 70 | ACG CTC TTC CGA TCT TGGTG GTC CAC GAG GTC TCT                                    |
| Illumina DNTAG Index 70 | ACG CTC TTC CGA TCT TGGTG GTG TCG GTC TCG TAG                                    |
| Illumina UPTAG Index 71 | ACG CTC TTC CGA TCT GTCCT GTC CAC GAG GTC TCT                                    |
| Illumina DNTAG Index 71 | ACG CTC TTC CGA TCT GTCCT GTG TCG GTC TCG TAG                                    |
| Illumina UPTAG Index 72 | ACG CTC TTC CGA TCT CCTTA GTC CAC GAG GTC TCT                                    |
| Illumina DNTAG Index 72 | ACG CTC TTC CGA TCT CCTTA GTG TCG GTC TCG TAG                                    |
| Illumina UPTAG Index 95 | ACG CTC TTC CGA TCT GCATA GTC CAC GAG GTC TCT                                    |
| Illumina DNTAG Index 95 | ACG CTC TTC CGA TCT GCATA GTG TCG GTC TCG TAG                                    |
| Illumina UPTAG Index 96 | ACG CTC TTC CGA TCT CCGTC GTC CAC GAG GTC TCT                                    |
| Illumina DNTAG Index 96 | ACG CTC TTC CGA TCT CCGTC GTG TCG GTC TCG TAG                                    |
| Illumina UPkanMX        | CAA GCA GAA GAC GGC ATA CGA GAT GTC GAC CTG CAG CGT<br>ACG                       |
| IlluminaDNkanMX         | CAA GCA GAA GAC GGC ATA CGA GAT ACG AGC TCG AAT<br>TCA TCG                       |
| Illumina P5             | A ATG ATA CGG CGA CCA CCG AGA TCT ACA CTC TTT CCC<br>TAC ACG ACG CTC TTC CGA TCT |

## REFERENCES

1. Robinson, D.G., Chen, W., Storey, J.D. & Gresham, D. Design and analysis of Bar-seq experiments. *G3 (Bethesda)* **4**, 11-18 (2014).
